# Supplementary material
Source: publisher figshare collection journal article supplement (https://acs.figshare.com/ndownloader/files/7030967)
Supplement: Supplementary file 1 [file 7030967]

# Supplementary Information

## Small Details Matter: the 2'-Hydroxyl as a Conformational Switch in RNA

Leonardo Darré<sup>1,2</sup>, Ivan Ivani<sup>1,2</sup>, Pablo D. Dans<sup>1,2</sup>, Hansel Gómez<sup>1,2</sup>, Adam Hospital<sup>1,2</sup>  
and Modesto Orozco<sup>1,2,3\*</sup>

<sup>1</sup>Institute for Research in Biomedicine (IRB Barcelona), The Barcelona Institute of Science and Technology, 08028 Barcelona, Spain

<sup>2</sup>Joint BSC-IRB Program in Computational Biology, Institute for Research in Biomedicine, 08028 Barcelona, Spain

<sup>3</sup>Department of Biochemistry, Faculty of Biology, University of Barcelona, 08028 Barcelona, Spain

\* Send correspondence to M.Orozco: [modesto.orozco@irbbarcelona.org](mailto:modesto.orozco@irbbarcelona.org)

### Contents

**Supplementary Methods 1:** Database Analysis.

**Supplementary Methods 2:** MD Additional Details.

**Supplementary Methods 3:** QM/MM Additional Details.

**Supplementary Methods 4:** Kappa Parametrization.

**Supplementary Methods 5:** Parmed.py commands for the Lennard-Jones specific interactions modification.

**Supplementary Methods 6:** QM/SCRF potential energy surface calculations.

**Supplementary Table 1:** Kappa Torsion Angle Analysis.

**Supplementary Table 2:** Kappa and Pucker Analysis for Ribonucleotides with 2'OH in Contact with ARG or LYS.

**Supplementary Table 3:** Protein-RNA Contacts Analysis.

**Supplementary Figure 1:** End to end distance distribution for dodecamers taken from RNA and DNA structural databases.

32 **Supplementary Figure 2:** Preferred Orientations of the Kappa Torsion per Base Type.  
33 **Supplementary Figure 3:** Possible hydrogen bonds nearby the 2'OH group.  
34 **Supplementary Figure 4:** Preferred Orientations of the Kappa Torsion Angle from a Non-  
35 Redundant Database.  
36 **Supplementary Figure 5:** Kappa Energy Profile for Different Window Sizes.  
37 **Supplementary Figure 6:** Protein-RNA Contacts from a Non-Redundant Database.  
38 **Supplementary Figure 7:** Kappa fitting to reproduce QM/MM potential of mean force.  
39 **Supplementary Figure 8:**  $\kappa$  vs puckering QM/SCRF potential energy surfaces for guanine  
40 mono-phosphate in the presence/absence of a Lys analogue.  
41 **Supplementary Figure 9:** MM puckering potential of mean force in a RNA-protein  
42 complex.  
43 **Supplementary Figure 10:** Lysine localization nearby the 2'OH in south puckering RNA  
44 nucleotides.  
45 **Supplementary Figure 11:** Arginine localization nearby the 2'OH in south puckering RNA  
46 nucleotides.  
47 **Supplementary References.**  
48  
49  
50  
51  
52  
53  
54  
55  
56  
57  
58  
59  
60  
61  
62  
63  
64  
65

## 66 **Supplementary Methods 1. Database Analysis.**

67 All the analysis of NMR or X-ray structures was done using local R scripts using the bio3D<sup>1</sup>  
68 libraries.

69 **Kappa Torsion Distribution.** Two datasets were used to build the kappa torsion empirical  
70 distribution: i- the “Full Dataset” which contains the current state of the PDB up to June  
71 2016 for NMR-solved structures containing RNA (610 entries), and ii- the “Non-Redundant  
72 Dataset” which contains NMR-solved RNA structures (476 entries) proposed by Leontis et  
73 al.<sup>2</sup> to avoid structural redundancy available from the BGSU Structural Bioinformatics  
74 Group web page (<http://rna.bgsu.edu/rna3dhub/nrlist/>), see Supplementary Table 1 for  
75 further details. For the Full Dataset, all NMR models in every PDB entry were split into  
76 RNA continuous segments (two or more residues), and the kappa torsion angle was  
77 measured for every ribonucleotide within a given segment. The canonical hydrogen bond  
78 local interactions of the 2'OH group were analyzed by measuring the distance between the  
79 2'OH hydrogen atom and the atoms: O3', O4' and O2 (pyrimidines)/N3 (purines) from the  
80 same ribonucleotide, or O5', OP1, OP2 and O4' of the ribonucleotide in 3'. In addition, non-  
81 canonical hydrogen bonds were assessed by measuring the distance between the H2' or  
82 O2' of a given ribonucleotide and O4' or H5'/H5'' of the ribonucleotide in 3', respectively.  
83 To capture the effect of the sugar conformation on the kappa torsion angle, the pucker  
84 phase was also measured using Westhof & Sundaralingam definition<sup>3</sup> and obtaining  
85 kappa/pucker phase pairs for each analyzed ribonucleotide. Kappa probability distributions  
86 were calculated using angle windows of 20 degrees and plotted for 3'endo and 2'endo  
87 pucker phases separately, for all bases together or split by base type. The correlation  
88 between the kappa torsion angle and the distances to local hydrogen bond  
89 acceptors/donors are shown by means of scatter plots and three density contours  
90 corresponding to points in the distance-kappa space with density equal to the average  
91 density plus one, two or four standard deviations. Finally, kappa distributions were  
92 converted to empirical free energies from the relative populations of kappa values between  
93 0 and 360 degrees, considering windows of 20, 15, 10 and 5 degrees, using the relation:  
94  $\Delta G_{i/0} = R \cdot T \cdot \ln(P_i/P_0)$ , where  $P_i$  and  $P_0$  are the population of kappa values for windows  $i$  and  
95 0, respectively. The windows [0,20], [0,15], [0,10], and [0,5] were used as reference  
96 (window 0) for each of the four striding options mentioned above. The measurement of  
97 kappa and pucker and the calculation of the empirical free energy were repeated for the  
98 Non-Redundant Dataset although in this case only specific chains and NMR models were  
99 used as suggested in the BGSU Structural Bioinformatics Group web page.

100 **Kappa Torsion and Pucker Phase Distributions in 2'OH-ARG/LYS Contacts.** Both  
101 dataset mentioned in the previous section were filtered keeping only PDB entries  
102 corresponding to protein-RNA complexes (see Supplementary Table 2). Kappa and pucker  
103 distributions were obtained for ribonucleotides with the 2'OH group in contact with the  
104 aminoacids ARG and LYS (distance between any ARG or LYS atom and the oxygen atom  
105 of the 2'OH moiety lower or equal to 4 Å). When multiple atoms from the same ARG or  
106 LYS residue were in contact with a given ribonucleotide 2'OH, the corresponding  
107 kappa/pucker pair was counted only once.

108 **Probability of Contacts Between a Given Aminoacid and the 2'OH Group.** The Full  
109 and the Non-Redundant Datasets filtered to keep only protein-RNA complexes, which  
110 contain only NMR-solved structures, were supplemented with X-ray solved protein-RNA  
111 complexes obtained from the current state of the PDB (up to June 2016) or the Leontis et  
112 al. non-redundant database, respectively, for resolutions below 2.5 Å. For both NMR/X-ray  
113 datasets, the number of contacts (distance  $\leq 4$  Å) between any amino acid atom and the  
114 2'OH oxygen atom was counted. When multiple atoms from the same amino acid were in  
115 contact with a given ribonucleotide 2'OH, the contact was counted only once to eliminate  
116 repeated counts per amino acid. The contacts frequency per amino acid was divided by  
117 the total number of observed contacts, thus obtaining the aminoacid-2'OH interaction  
118 probability given that a contact exists.

119 **Cluster analysis of Lys and Arg residues close to south puckering.** The principal  
120 components of the Cartesian coordinates of the NZ atom (Lys) or CZ atom (Arg) were  
121 calculated for all occurrences of Lys or Arg residues within 4 Å of the O2' atom in south  
122 puckering nucleotides in the non-redundant database. The first two principal components  
123 were used as coordinates to hierarchically cluster the position of the cationic protein side  
124 chains in space. Distance histograms between all hydrogen bond donor nitrogen atoms in  
125 Lys or Arg and the O2', O3', OP1, OP2 and O5' atoms in RNA were constructed for: (i) all  
126 the considered structures containing Lys residues, (ii) all the considered structures  
127 containing Arg residues, and (iii) the two main PC-based clusters.

128 **End to end distance measurement.** To account for the difference in the conformational  
129 space of RNA compared to DNA, the end to end distance was measured for all RNA and  
130 DNA fragments in the non-redundant RNA database and all available structures in the  
131 Protein Data Bank (up to 22<sup>nd</sup> Nov 2016), respectively. This was done cutting all nucleic  
132 acid fragments into dodecamer strands (removing shorter segments) and measuring the  
133 distance between the C1' atom of the 5' and 3' terminal atoms.

134

## 135 **Supplementary Methods 2. MD Additional Details.**

136 All classical MD simulations were run using AMBER-14 suite. TLEAP code was used for  
137 systems preparation, CPPTRAJ for post-processing and analyzing trajectories and  
138 ParmEd to modify and check topologies when needed (e.g. scale torsion angles force  
139 constants for HREMD calculations). Restraints were imposed using native AMBER  
140 algorithms or by means of the PLUMED 2.2 patch to AMBER-14. Generation of free  
141 energy profiles from umbrella sampling simulations was achieved using vFEP.<sup>4</sup>

142 **Unbiased Molecular Dynamics Simulations.** Microsecond long MD simulations of six  
143 RNA structures corresponding to three hairpins (PDBIDs: 1JJ2, 1Q9A and 2KOC ) and  
144 three kissing loops (PDBIDs: 1BAU, 2BJ2 and 2RN1) were run using parm99 forcefield<sup>5,6</sup>  
145 supplemented with the bsc0<sup>7</sup> and chiOL3<sup>8,9</sup> corrections (here in called “parmbsc0chiOL3”)  
146 to model the RNA. To take into account solvent model effects, two of the most widely used  
147 water models were employed, TIP3P<sup>10</sup> for the hairpin structures and SPC/E<sup>11</sup> for the  
148 kissing loops structures. In all cases a 150mM ionic environment was represented using  
149 Dang parameters<sup>12–14</sup> for K<sup>+</sup> and Cl<sup>-</sup>. MD simulations were performed in the NPT ensemble  
150 using Berendsen thermostat<sup>15</sup> with a time constant of 5 ps<sup>-1</sup> and the Berendsen barostat  
151 with a time constant of 5 ps<sup>-1</sup>. Equations of motion were integrated using a time step of 2fs  
152 with the pmemd.cuda code.<sup>16</sup> Each system was subject to 2000 steps of energy  
153 minimization with position restraints in the solute of 25 kcal/mol, followed by 1 ns of  
154 position restrained (5 kcal/mol) thermalization in the NVT ensemble and 10 ns  
155 unrestrained equilibration in the NPT ensemble. Production MD simulations were run for 1  
156  $\mu$ s. Non-bonded direct cut-off was set to 9 Å and particle mesh Ewald<sup>17</sup> was used for  
157 reciprocal space calculations. All bonds involving hydrogen atoms were constrained by  
158 means of SHAKE algorithm.<sup>18</sup>

159 **Hamiltonian Replica Exchange Molecular Dynamics Simulations.** The conformational  
160 landscape of two tetranucleotides, rGACC and rCCCC, were explored enhancing the  
161 sampling by allowing coordinates exchange between eight replicas where all torsion angle  
162 force constants are scaled by: 1, 0.9 , 0.8, 0.7, 0.6, 0.5, 0.4, and 0.3, achieving an  
163 exchange acceptance in the range of 25-60%. rGACC initial structure was taken from an  
164 A-form portion of the *H. marismortui* ribosome crystal structure (PDBID: 3G6E, residues  
165 2623-2626), following the same approach as Henriksen et al.<sup>19</sup> rCCCC initial structure was  
166 generated in a random conformation using NAB. The RNA molecule in each system was  
167 modelled using parmbsc0chiOL3, solvated using the TIP3P model<sup>10</sup> and neutralized with

168 three K<sup>+</sup> ions using Dang parameters.<sup>12–14</sup> Preparation of both systems for the first set of  
169 HREMD involved 2000 steps of position restrained (25 kcal/mol) minimization, and heated  
170 during 2 ns of MD from 10-150 K (NVT and 25 kcal/mol position restraints) and from 150-  
171 300 K (NPT and 5 kcal/mol position restraints), using a time step of 1 fs. System density at  
172 300 K and 1 Bar was relaxed in 5 ns of 2 fs time step MD in the NPT ensemble with soft  
173 position restraints (0.5 kcal/mol) further extended by 500 ps of unrestrained equilibration in  
174 NVT. Production HREMD simulations were run in the NVT ensemble at 300 K using the  
175 Langevin thermostat with a collision frequency of 2 ps<sup>-1</sup> and resetting the random seed at  
176 each restart to avoid synchronization effects. A 2 fs time step was used with an exchange  
177 attempt every 1 ps. Non-bonded direct cut-off was set to 8 Å and particle mesh Ewald<sup>17</sup>  
178 was used for reciprocal space calculations. All bonds involving hydrogen atoms were  
179 constrained by means of SHAKE algorithm.<sup>18</sup> The independent second run of HREMD  
180 simulations were started from the restart structures of the first run after 500 ns, assigning  
181 new velocities and equilibrating for 1 ns in the NVT ensemble. Total simulated time for  
182 both independent runs was 1.2 μs per replica. Equations of motion were integrated using  
183 the pmemd.cuda.MPI code.

184 **Umbrella Sampling Molecular Dynamics Simulations.** Classical mechanics umbrella  
185 sampling simulations were run for the rCpC dinucleotide to obtain the kappa torsion  
186 potential of mean force in order to compare with the corresponding profiles at QM/MM  
187 level. For both systems, the solute was modelled using parmbsc0chiOL3 forcefield,  
188 solvated using TIP3P water model<sup>10</sup> and neutralized (rCpC) with one K<sup>+</sup> ions using Dang  
189 parameters<sup>12–14</sup>. The rotation of the kappa torsion was sampled in twenty windows of 18  
190 degrees applying a restraining potential on kappa of 35 kcal/mol. Each window initial  
191 configuration was extracted from an exploratory well tempered metadynamics<sup>20</sup> simulation  
192 (50 ns; initial Gaussian high of 1.2 kJ/mol; deposition period of 1ps; sigma=0.35 radians;  
193 BIASFACTOR=4, T=300 K) of the rCpC dinucleotide, and further equilibrated for 500 ps in  
194 the NPT ensemble at 300K and 1 Barr. Production data was collected for 2.5 ns of NPT  
195 molecular dynamics for each window. Restraints on beta and gamma backbone torsions,  
196 as well as on the sugar pucker were used as in the QM/MM simulations detailed below.  
197 Umbrella sampling was also used to obtain the puckering PMF for the cytosine 6 residue  
198 of a RNA fragment in complex with protein MIWI PAZ domain (PDB ID: 2XFM; model 6)  
199 for the wild type (presence of Lys 316 close to the 2'OH group of cytosine 6) and for a  
200 mutant (Lys316Ala). The RNA-protein complex was modeled using  
201 parmbsc0chiOL3KappavdW forcefield modification (RNA) and FF14SB (protein), solvated



202 using TIP3P water model<sup>10</sup> and neutralized with K<sup>+</sup> ions using Dang parameters.<sup>12–14</sup> The  
203 system was subject to 2000 steps of energy minimization with position restraints on both  
204 RNA and protein of 25 kcal/mol, followed by 500 ps of position restrained (5 kcal/mol)  
205 thermalization in the NVT ensemble and 500 ps restrained (2.5 kcal/mol) equilibration in  
206 the NPT ensemble. Production MD simulations were run for 2.2 ns in the NPT ensemble,  
207 keeping the last 1.2 ns for PMF calculation. Position restraints (2.5 kcal/mol) on the RNA  
208 (except for residue 6 and atoms C5', H5', H5'', O5', P', OP1 and OP2 of residue 7) where  
209 applied to avoid gross changes in the RNA structure during the puckering transition. In the  
210 case of the wild type, potential energy walls were placed at 3 Å from O2' and OP2 atoms  
211 to keep the contact with Lys 316 during the puckering transition. Non-bonded direct cut-off  
212 was set to 8 Å and particle mesh Ewald<sup>17</sup> was used for reciprocal space calculations. All  
213 bonds involving hydrogen atoms were constrained by means of SHAKE algorithm.<sup>18</sup> The  
214 pucker transition was sampled in twelve windows of 18 degrees applying a restraining  
215 potential on the pucker phase (as defined in PLUMED 2.2<sup>22</sup>) of 35 kcal/mol. Calculation of  
216 the free energy profile was achieved by means of the vFEP program.<sup>4</sup>

217

### 218 **Supplementary Methods 3. QM/MM Additional Details.**

219 All QM/MM dynamics simulation were run using the interface between TERACHEM<sup>23–26</sup>  
220 (QM) and AMBER (MM) as implemented in AMBER-14, with a time step for the integration  
221 of the equations of motion of 1 fs. Potential energy walls (when required) and/or restraints  
222 were enforced by means of PLUMED 2.2<sup>22</sup> patch to AMBER-14. Calculation of the free  
223 energy profile from the umbrella sampling trajectories was achieved using vFEP.<sup>4</sup>

224 **Kappa Torsion Potential of Mean Force.** Umbrella sampling QM/MM simulations were  
225 run to obtain the free energy profile of the C2'O2' (kappa) torsion rotation for a cytosine  
226 nucleoside (rC) and for a cytosine dinucleotide (rCpC) in aqueous solution. The system  
227 setup was the same as per the classical umbrella sampling calculations (see previous  
228 section). In both cases the nucleic acid was treated at the quantum level BLYP/6-31G(d)  
229 while the aqueous environment (water or water plus one K<sup>+</sup> ion) was treated at the  
230 classical level (TIP3P<sup>10</sup> and Dang parameters<sup>12–14</sup> for ions). The rotation of the kappa  
231 torsion was sampled in twenty windows of 18 degrees applying a restraining potential on  
232 kappa of 35 kcal/mol. Each window was first equilibrated fully classically  
233 ("parmbsc0chiOL3") for 500 ps in the NPT ensemble (300 K and 1 Barr). The restart  
234 classical configurations were relaxed at the QM/MM level for 5 ps and production  
235 simulations were carried out for 40 and 25 ps for rC and rCpC, respectively. Wavefunction

236 SCF calculations were done in mixed precision including DFTD3 dispersion corrections.<sup>27</sup>  
237 In the case of the rC nucleoside, sugar pucker transitions were frequently observed  
238 affecting the sampling of the kappa rotation. Consequently, a potential energy wall as  
239 implemented in PLUMED 2.2<sup>22</sup> was applied to the Zx Cartesian coordinate of the ring  
240 puckering<sup>21</sup> (a lower wall at Zx=0.3 to maintain the 3'endo conformation or an upper wall at  
241 Zx=-0.3 to maintain the 2'endo conformation). The dinucleotide simulation maintained the  
242 3'endo initial pucker, thus the use of walls was not required (that was not the case for the  
243 MM simulations where pucker phase restraints were needed). For both rC and rCpC,  
244 5kcal/mol restraints on the beta and gamma backbone torsions were applied to avoid  
245 interactions with the phosphate oxygen atoms. For rC additional restraints (5kcal/mol)  
246 were also applied on epsilon backbone torsion to keep it at the standard value.

247

248 **Supplementary Methods 4. Kappa Parametrization.** In parm99bsc0chiOL3 the C2'O2'  
249 torsion rotation is controlled by three dihedral angles: C1'-C2'-O2'-HO2' (dihedral type: CT-  
250 CT-OH-HO), C3'-C2'-O2'-HO2' (dihedral type: CT-CT-OH-HO) and H2'-C2'-O2'-HO2'  
251 (dihedral type: H1-CT-OH-HO). To avoid affecting non-RNA OH moieties described using  
252 the current AMBER forcefield distributions, a new atom type for the O2' atom was  
253 introduced (OK) for refitting the Kappa torsion angle. The dihedral type H1-CT-OH-HO was  
254 substituted by H1-CT-OK-HO with a new set of parameters, while the dihedral type CT-  
255 CT-OH-HO was renamed CT-CT-OK-HO but keeping the original set of parameters. As in  
256 the parmbsc0 and parmbsc1 parametrization procedure, a flexible Metropolis Monte Carlo  
257 algorithm was used to fit a truncated third order Fourier series to the difference between: i-  
258 QM/MM pmf of the Kappa rotation for the rCpC dinucleotide, and ii- the corresponding pmf  
259 obtained at MM level (parmbsc0chiOL3<sub>H1-CT-OK-HO=0</sub>). Both QM/MM and MM potentials of  
260 mean force were obtained from umbrella sampling calculations for the sugar in North  
261 conformation as described in Supplementary Methods 2 and 3 (see Supplementary Figure  
262 7A). The obtained new parameters (see Supplementary Table 4) were tested on two  
263 tetranucleotide systems (rGACC and rCCCC) exhaustively exploring their conformational  
264 landscapes by means of Hamiltonian Replica Exchange simulations (see Supplementary  
265 Methods 2 for simulation details). In addition to the previous parametrization, a second  
266 fitting was performed considering a specific modification of the Lennard-Jones potential  
267 (increase in the sigma parameter) between the phosphate oxygen atoms and : i- the ribose  
268 O2', O3' atoms, and ii- the amine nitrogen of the base (N6 in A, N2 in G and N4 in C),  
269 herein called "parmbsc0chiOL3vdW". This correction to the Lennard Jones potential is



270 based on the AMBER parameters revision for organic phosphates proposed by  
271 Steinbrecher et al,<sup>28</sup> which was recently shown to improve the description of RNA  
272 tetranucleotides.<sup>29</sup> In the present work, instead of including a general Lennard-Jones  
273 correction affecting the interaction between the phosphate oxygen atoms and all other  
274 atoms in the system, the specific terms affecting only the atoms mentioned above were  
275 corrected (see Supplementary Methods 5 section for the parmed.py script). The Kappa  
276 torsion parameters were fitted as before but using the parmbsc0chiOL3vdW<sub>H1-CT-OK-HO=0</sub>  
277 pmf for the MM level reference (see Supplementary Figure 7). The obtained parameters  
278 (see Supplementary Table 5) were tested again on the tetranucleotide systems (rGACC  
279 and rCCCC) and on microsecond-long unbiased MD simulations of a RNA hairpin (PDB  
280 ID: 2KOC; see Supplementary Methods 2 for simulation details).

281

282 **Supplementary Methods 5. Parmed.py commands for the Lennard-Jones specific**  
283 **interactions modification.**

```
284 changeLJPair @%OS @%N2 3.5958 0.17  
285 changeLJPair @%O2 @%N2 3.5733 0.188944436  
286 changeLJPair @%O2 @%OH 3.4703 0.210199905  
287 changeLJPair @%OS @%OH 3.4928 0.189124298  
288 changeLJPair @%O2 @%OK 3.4703 0.210199905  
289 changeLJPair @%OS @%OK 3.4928 0.189124298  
290 addLJType @O4' radius 1.6837 epsilon 0.1700  
291 parmout OUTFILE  
292 go
```

293

294 **Supplementary Methods 6: QM/SCRF potential energy surface calculations.** RNA  
295 Guanine residue 65 and protein Lys residue 32 from the RNA-protein complex structure  
296 with PDB ID 4BY9 was used as starting point to build the atomistic models used in  
297 Quantum Mechanics (QM) Potential Energy Surface (PES) calculations. This nucleotide-  
298 amino acid pair belongs to the most populated cluster (cluster A) of Lys residues within 4 Å  
299 of the O2' atom of south puckering nucleotides (see Supplementary Figure 10). From such  
300 structure, the Guanine mono-phosphate (keeping the C5', H5', and H5'' of the nucleotide  
301 at 3', and completing the C5' valence with a third H atom) and the methyl-ammonium  
302 group were kept for the QM calculation while the rest of the atoms were removed.  
303 Initially, a first round of QM geometry optimizations was performed restraining the sugar  
304 ring torsions v1 and v3 to scan the pucker North<->East<->South transition (0 to 190 in 10  
305 degrees steps) and kappa at 216 degrees. Starting from these structures (restrained to the  
306 corresponding puckering value) further optimizations were performed restraining kappa to  
307 values ranging from 18 to 216 in steps of 18 degrees, giving a total of 240 calculations for

every PES. Additional restraints were applied to  $\beta$ ,  $\gamma$ ,  $\varepsilon$ ,  $\zeta$  and  $\alpha$  torsions to maintain the experimental conformation of the backbone, and on  $\chi$  at 190 or 230 degrees for North or South puckering values, respectively, to take into account the correlation between the puckering and the glycosidic torsion. Geometry optimizations in the presence of the methyl ammonium were initially done applying distance restraints between the nitrogen in methyl ammonium and both OP2 and O2' atoms in the nucleoside mono-phosphate. Such restraints were subsequently removed to let the position of the methyl ammonium to relax to the nearest potential energy minimum. This procedure ensured the presence of the hydrogen bonds with the phosphate and 2'OH in the complete PES scan. Geometry optimizations were done with the DL-FIND optimiser<sup>30</sup> implemented in the modular package ChemShell<sup>31,32</sup>. Turbomole 6.6<sup>33</sup> was used to compute energies and gradients at the QM(blyp<sup>34,35</sup>/def2-SVP<sup>36,37</sup>) level of theory and taking advantage of the Resolution-of-the-Identity (RI) approximation<sup>36,38</sup>. Geometry optimizations were performed using the continuum solvation model named Direct Conductor-like Screening Model for Real Solvents (DCOSMO-RS<sup>39</sup>, as implemented in Turbomole), with a permittivity  $\varepsilon=78$ .

323

324 **Supplementary Table 1. Kappa Analysis (only NMR structures).<sup>a</sup>**

|                                | Full Dataset                  | Non-redundant Dataset        |
|--------------------------------|-------------------------------|------------------------------|
| Number of entries              | <b>610 (7518)<sup>b</sup></b> | <b>476 (531)<sup>b</sup></b> |
| Number of analysed entries     | <b>584 (7256)<sup>b</sup></b> | <b>459 (503)<sup>b</sup></b> |
| Number of analysed nucleotides | <b>174511</b>                 | <b>11212</b>                 |

325 <sup>a</sup>All available NMR models were used in the PDB (10/06/2016) set analysis, while only  
326 specific models were used for the non-redundant dataset (see Supplementary Methods 1).

327 <sup>b</sup> Number of NMR models for the given set of PDB entries.

328

329

330

331

332

333

334

335

336

337

338

339

340

341 **Supplementary Table 2. Kappa and pucker analysis for ribonucleotides with 2'OH in**

342 **contact (distance  $\leq 4$  Å) with ARG or LYS (only NMR structures).**

|                                                               |     | Full Dataset                  | Non-redundant Dataset       |
|---------------------------------------------------------------|-----|-------------------------------|-----------------------------|
| Number of protein-RNA PDB entries available                   |     | <b>107 (1709)<sup>a</sup></b> | <b>89 (135)<sup>a</sup></b> |
| Number of protein-RNA PDB entries analysed                    |     | <b>107 (1709)<sup>a</sup></b> | <b>89 (135)<sup>a</sup></b> |
| Number of analysed nucleotides with the 2'OH in contact with: | ARG | <b>1756<sup>b</sup></b>       | <b>212<sup>b</sup></b>      |
|                                                               | LYS | <b>1647<sup>b</sup></b>       | <b>152<sup>b</sup></b>      |

343 <sup>a</sup> Number of NMR models for the given set of PDB entries.

344 <sup>b</sup> Removing repeated kappa/pucker values due to contacts with different atoms of the  
345 same aminoacid in a given contact.

346  
347 **Supplementary Table 3. Protein-RNA contacts analysis.**

|                                                   |  | Full Dataset                  | Non-redundant Dataset        |
|---------------------------------------------------|--|-------------------------------|------------------------------|
| Number of available PDB entries                   |  | <b>514</b>                    | <b>319</b>                   |
| Number of available X-ray entries                 |  | <b>407</b>                    | <b>230 (238)<sup>b</sup></b> |
| Number of available NMR entries                   |  | <b>107 (1709)<sup>c</sup></b> | <b>89 (135)<sup>c</sup></b>  |
| Total number of available models (X-RAY+NMR)      |  | <b>2116</b>                   | <b>373</b>                   |
| Number of analysed PDB entries                    |  | <b>500</b>                    | <b>307</b>                   |
| Total Number of analysed models (X-RAY+NMR)       |  | <b>2102</b>                   | <b>361</b>                   |
| Number of analysed contacts (distance $\leq 4$ Å) |  | <b>26760<sup>a</sup></b>      | <b>5309<sup>a</sup></b>      |

348 <sup>a</sup> Removing repeated counts from different atoms of the same aminoacid in a given  
349 contact.

350 <sup>b</sup> Number of X-RAY models for the given set of PDB entries.

351 <sup>c</sup> Number of NMR models for the given set of PDB entries.

352

353

354

355

356

357  
358

**Supplementary Table 4. H1-CT-OK-HO parameters.**

| Torsion     | $V_n/2$ | Phase | Periodicity |
|-------------|---------|-------|-------------|
| H1-CT-OK-HO | 0.482   | 18.8  | -3          |
| H1-CT-OK-HO | 0.336   | 59.4  | 2           |
| H1-CT-OK-HO | 0.549   | 96.9  | 1           |

359  
360  
361

**Supplementary Table 5. H1-CT-OK-HO parameters considering vdW specific corrections.**

| Torsion     | $V_n/2$ | Phase | Periodicity |
|-------------|---------|-------|-------------|
| H1-CT-OK-HO | 0.501   | 0.0   | -3          |
| H1-CT-OK-HO | 0.287   | 74.3  | 2           |
| H1-CT-OK-HO | 0.519   | 60.7  | 1           |

362  
363

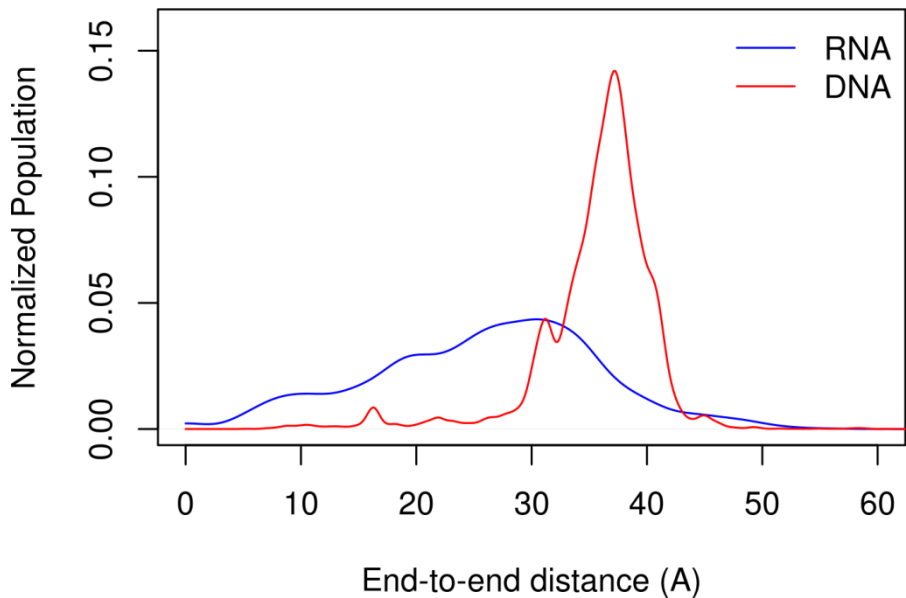

364

**Supplementary Figure 1.** End to end distance for all RNA and DNA fragments available in the non-redundant RNA database or in the Protein Data Bank (up to 22<sup>nd</sup> Nov 2016, with a filter for DNA or DNA-protein entries). Contiguous fragments of twelve residues are considered for the distance measurement discarding those shorter. The distance is defined between the C1' atoms in the 5' and 3' terminal residues.

370

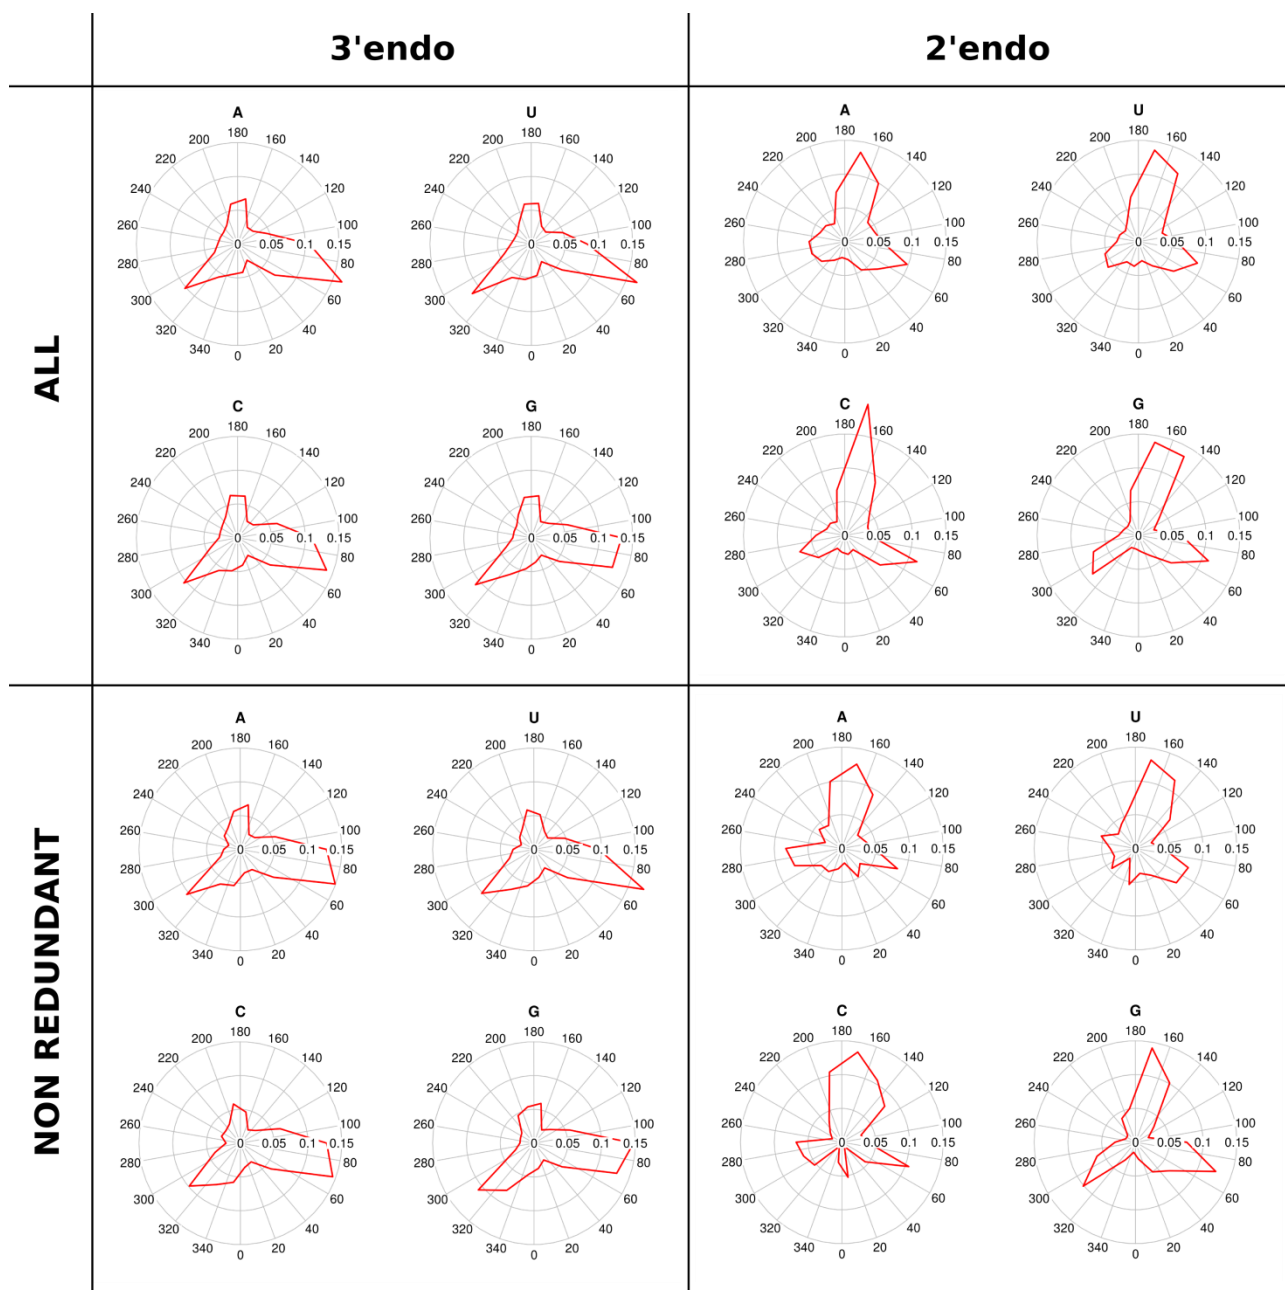

**Supplementary Figure 2. Preferred orientations of the kappa torsion per base type.**  
The plots show the probability distribution of the torsion angle between the atoms H2'-C2'-O2'-HO2' for 3'endo or 2'endo ribonucleotides and for the current state of the PDB or a non-redundant database (see Supplementary Methods 1), split by base type.

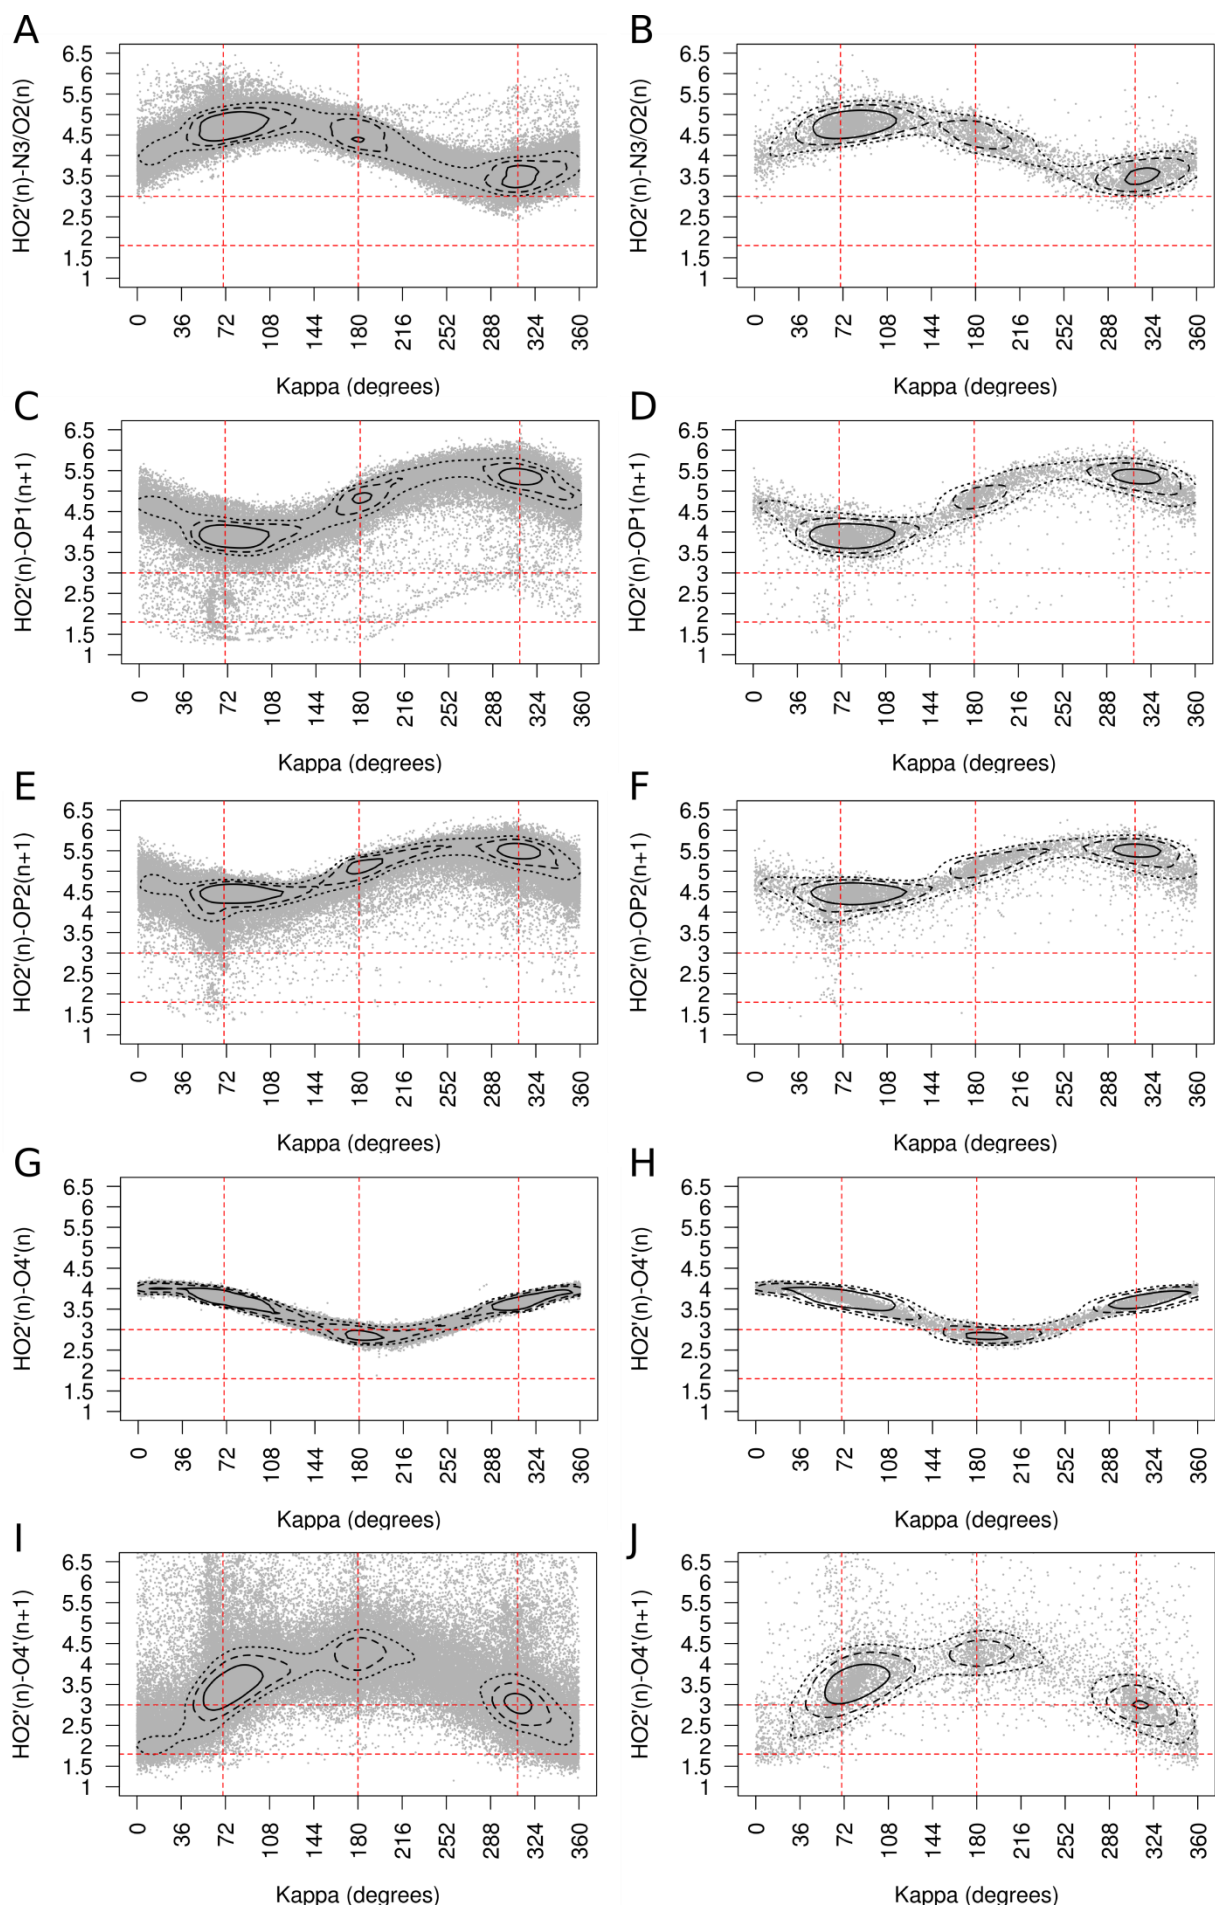



379 **Supplementary Figure 3. Possible hydrogen bonds acceptor/donors nearby the**  
 380 **2'OH group.** Scatter plots of kappa torsion vs distance between HO2' and local acceptors  
 381 of hydrogen bonds, are shown for nucleotides with pucker phase in North for both Full  
 382 Dataset (A, C, E, G and I) and Non-Redundant Dataset (B, D, F, H and J). Red dotted  
 383 lines indicate optimal and maximum hydrogen bond distances (horizontal), and kappa  
 384 rotation minimum energy positions (vertical). Contour lines correspond to points with  
 385 density values equal to the average density plus 1 (dotted line), 2 (dashed line) and 4  
 386 (continuous line) standard deviations.

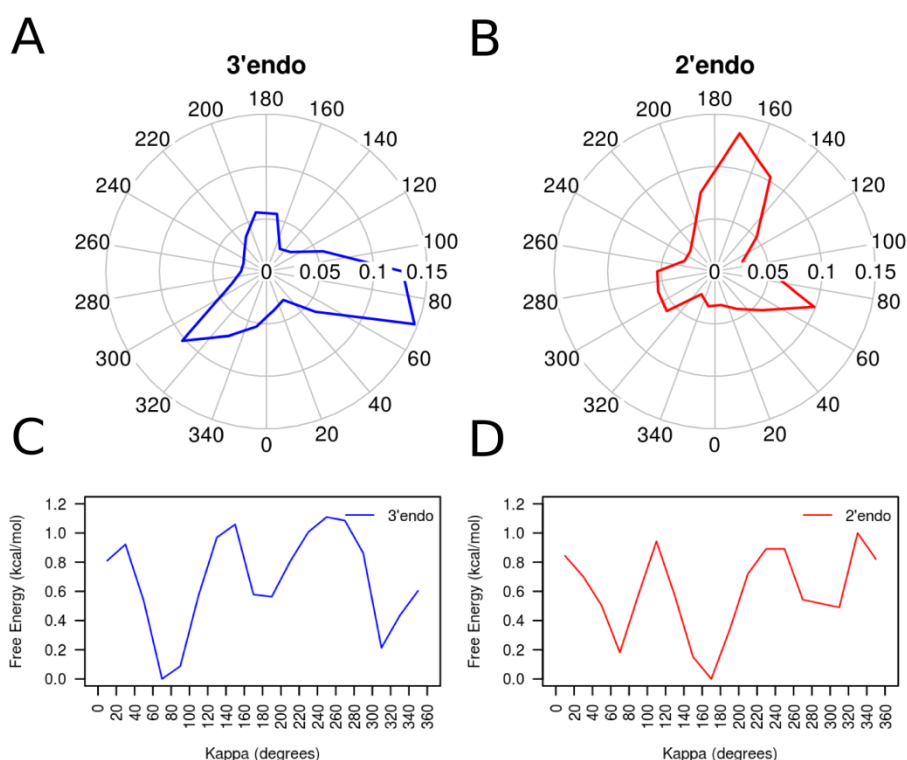

389  
 390  
 391 **Supplementary Figure 4. Preferred orientations of the kappa torsion from a non-**  
 392 **redundant database.** (A) Probability distribution of the torsion angle between the atoms  
 393 H2'-C2'-O2'-HO2' for all the 3'endo ribonucleotides of the RNA dataset obtained from a  
 394 non-redundant database (see Supplementary Methods 1). (B) Same as in (A) but for  
 395 2'endo ribonucleotides. (C,D) Empirical free energy calculated from the experimental  
 396 kappa distributions in (A) and (B), respectively.

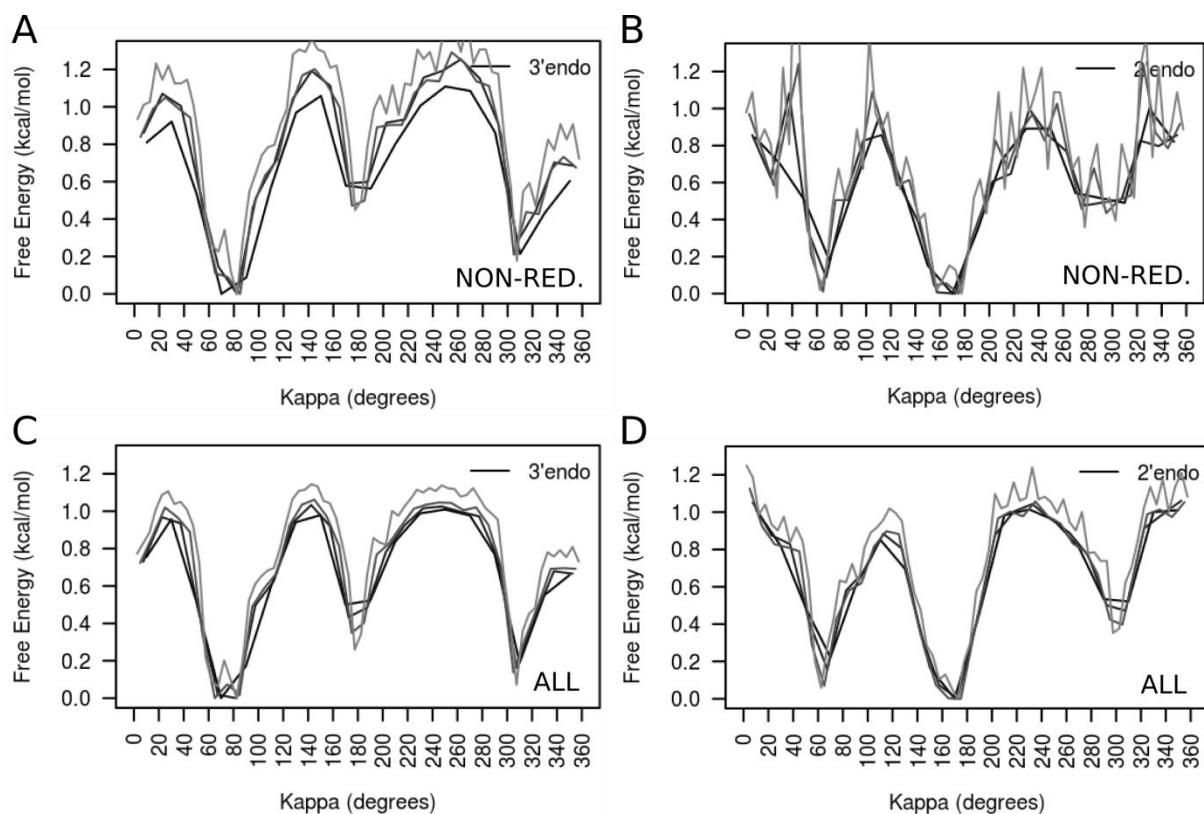

399  
 400 **Supplementary Figure 5. Kappa energy profile for different window sizes.** (A)  
 401 Empirical free energy calculated from the kappa distribution of 3'endo ribonucleotides of  
 402 the non-redundant RNA dataset (see Supplementary Methods 1), splitting the data using  
 403 four different window sizes: 20 degrees (black), 15 degrees (dark gray), 10 degrees (gray),  
 404 and 5 degrees (light gray). (B) Same as in (A) but for 2'endo ribonucleotides. (C) Same as  
 405 in (A) but using all current RNA entries in the PDB. (D) Same as (C) but for 2'endo  
 406 ribonucleotides.  
 407

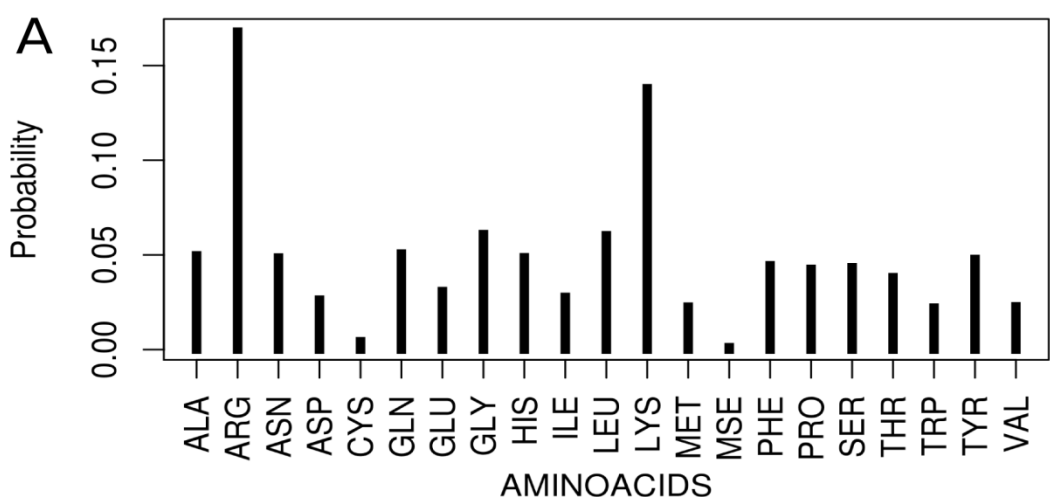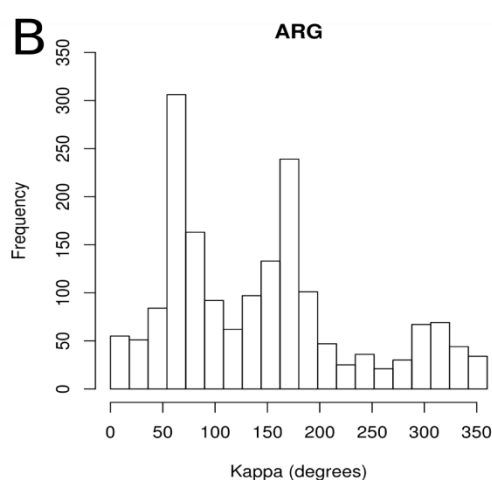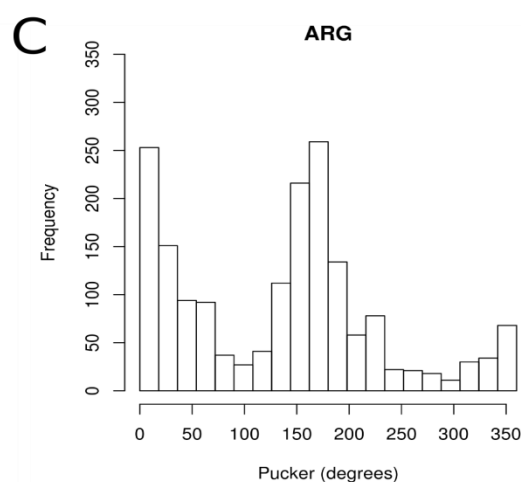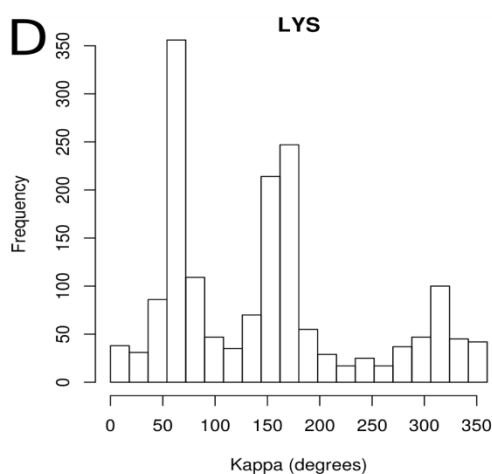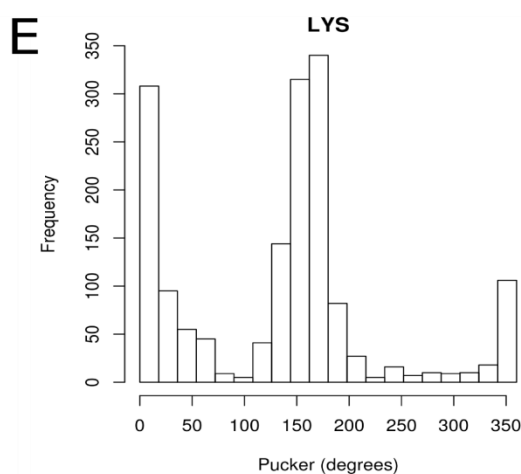

**Supplementary Figure 6. Protein-RNA contacts for the Full Dataset.** (A) Probability of contact between a given aminoacid and the 2'OH given a protein-RNA contact occur, calculated from counting all contacts (distance $\leq$ 4 Å) between any protein atom and the oxygen of 2'OH, and splitting the counts per amino acid identity. Multiple atoms of a given aminoacid within the distance cutoff were counted as one contact. All X-ray and NMR

414 (multiple models) from the Full Dataset (see Supplementary Methods 1) were used. B)  
 415 Frequency of kappa values for RNA nucleotides in contact with ARG atoms (distance  $\leq 4$   
 416 Å) obtained from NMR (multiple models) structures in the Full dataset. C) Frequency of  
 417 pucker phase values for RNA nucleotides in contact (distance  $\leq 4$  Å) with ARG atoms  
 418 obtained from NMR (multiple models) structures in the Full Dataset. D,E) Same as B and  
 419 C, respectively, but for LYS amino acid.

420  
 421

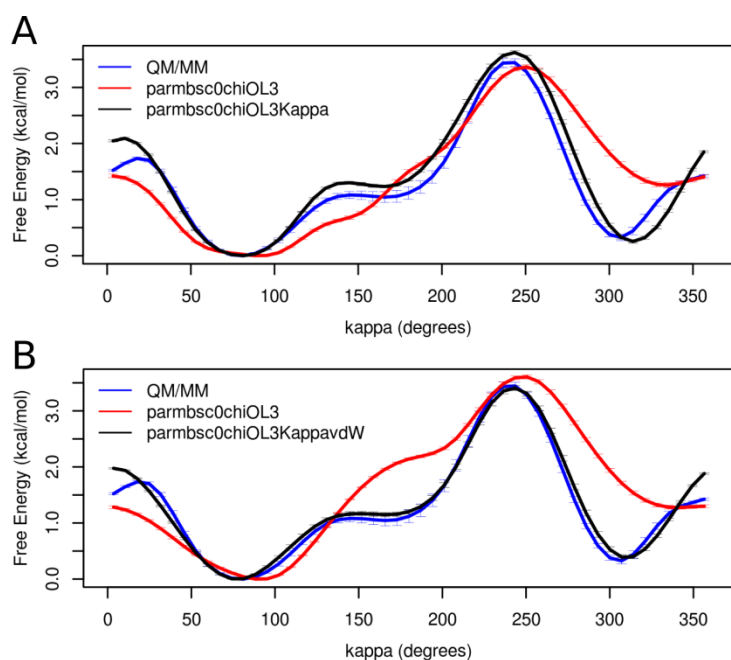

422 **Supplementary Figure 7.** Kappa fitting to reproduce QM/MM potential of mean force. (A)  
 423 US QM/MM (blue), MM parmb0chiOL3<sub>H1-CT-OK-HO=0</sub> (red) and MM parmb0chiOL3 with  
 424 the correction on the kappa torsion (parmb0chiOL3Kappa, black) free energy profiles for  
 425 the kappa torsion of a rCC dinucleotide. The profile and error bars correspond to the  
 426 average and standard deviation from five energy profiles obtained after 20-25ps every 1 ps  
 427 (QM/MM) and 2-2.5ns every 100ps (parmb0chiOL3<sub>H1-CT-OK-HO=0</sub> and  
 428 parmb0chiOL3Kappa). (B) Same as in (A) but including the Lennard-Jones modification  
 429 (see Supplementary Methods 4) on parmb0chiOL3<sub>H1-CT-OK-HO=0</sub> (red) and on  
 430 parmb0chiOL3Kappa (black).

431  
 432  
 433  
 434  
 435

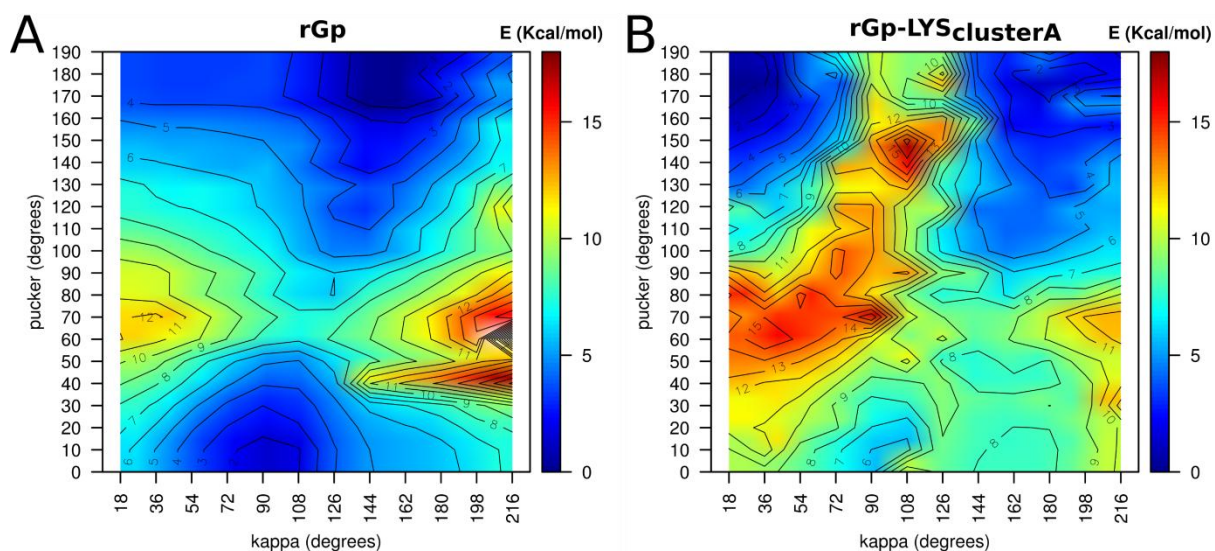

**Supplementary Figure 8:**  $\kappa$  vs puckering QM/SCRF potential energy surfaces for guanine mono-phosphate in the absence (A) and presence (B) of a lysine analogue (methyl-ammonium) placed at the most populated position (cluster A, see Supplementary Figure 10) for cationic residues nearby the 2'OH of south puckering nucleotides in the non-redundant Database.

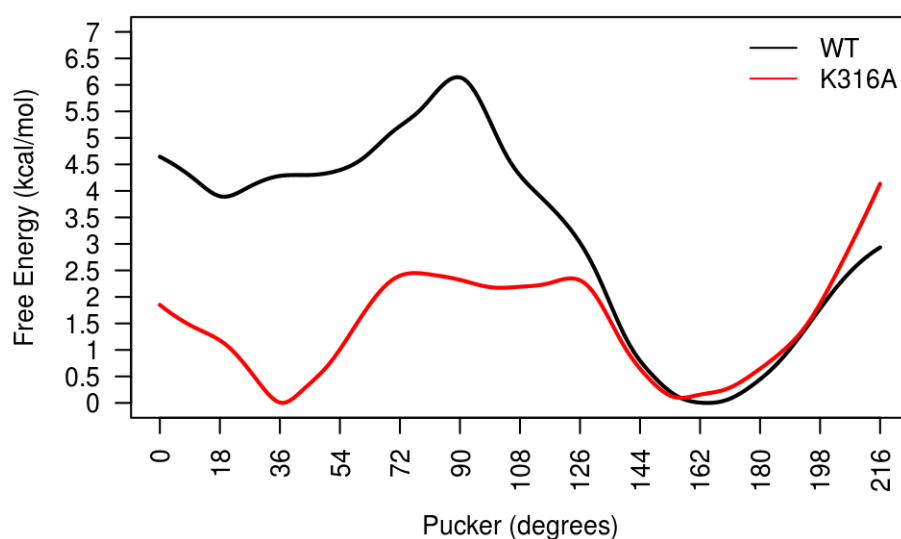

**Supplementary Figure 9:** Puckering PMF of cytosine 6 in the MIWI PAZ domain-RNA complex (PDB ID: 2XFM; model 6) for the wild type (black trace) where Lys 316 is located at cluster A (see Supplementary Figure 10) and for the Lys316Ala mutant.

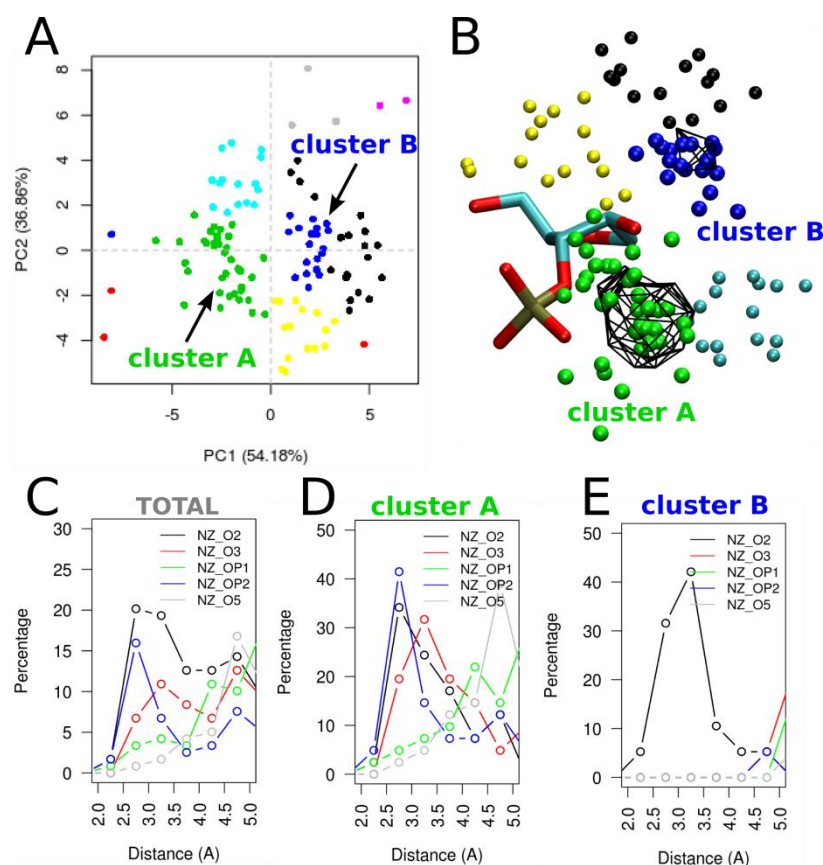

**Supplementary Figure 10.** Lysine localization nearby the 2'OH atom in south pucker RNA nucleotides. (A) PCA-based clustering of LYS NZ atom (projection on principal components 1 and 2) for all occurrences of LYS residues within 4 Å of the O2' of south pucker nucleotides in protein-RNA complexes of the non-redundant database. The two most populated clusters are labeled. (B) Position of the LYS ammonium atom around a nucleotide (base omitted for clarity), for the most populated clusters considered in (A), coloured by cluster identity. Occupancy isosurfaces corresponding to 60% of maximum occupancy are shown as a black wireframe. (C) Histogram of the distance between NZ atom in LYS and O2', O3', OP1, OP2 and O5' in RNA for all LYS residues considered in (A). (D,E) Same as in (C) but for the two most populated clusters.



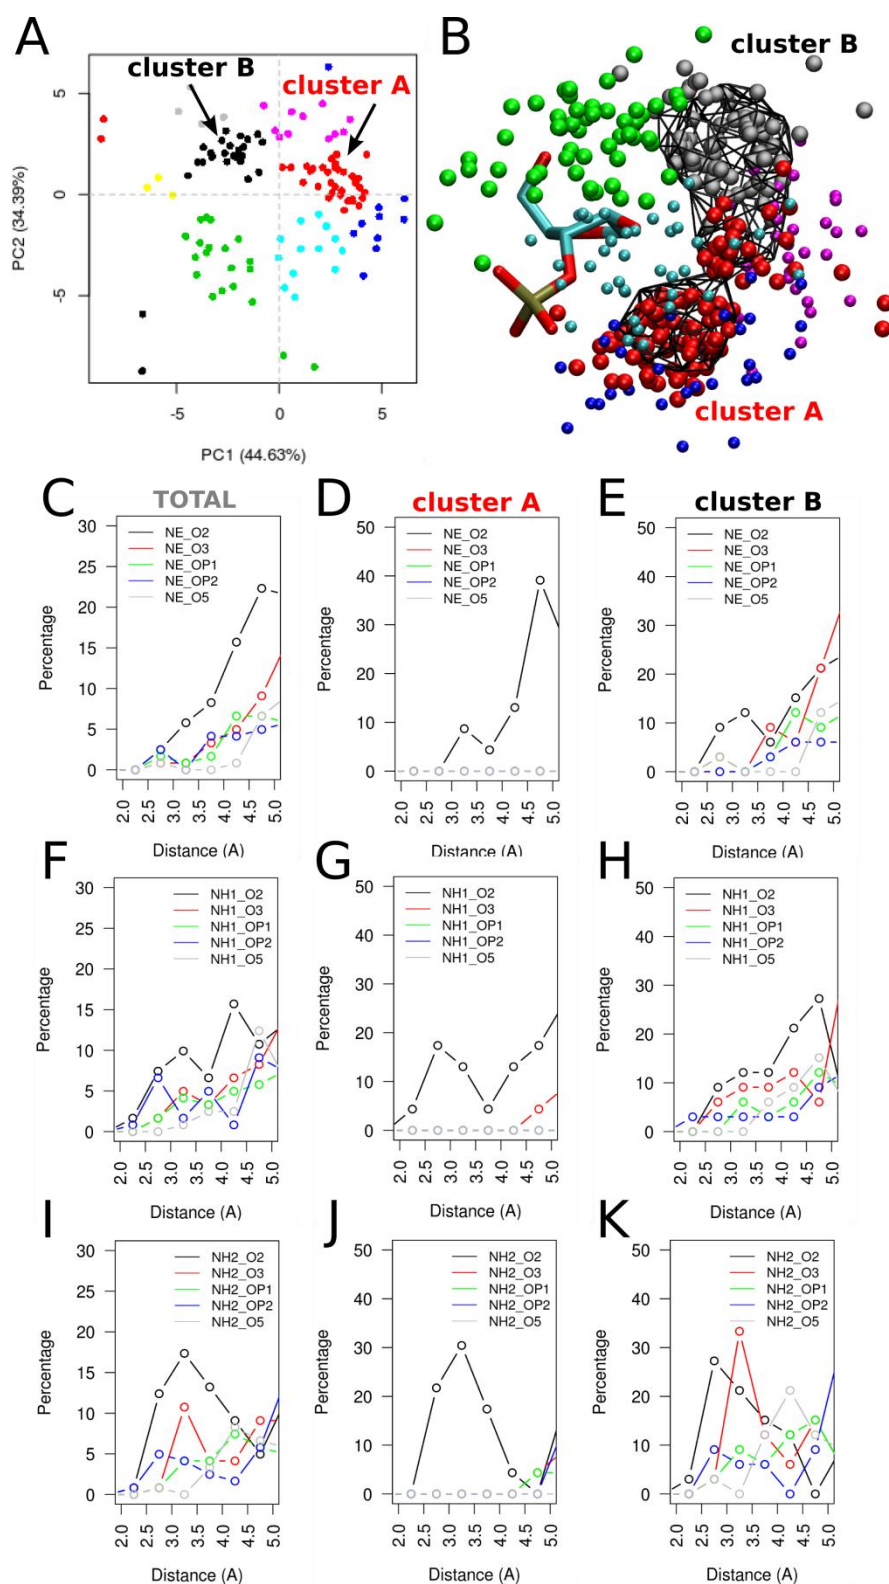

467

468 **Supplementary Figure 11.** Arginine localization nearby the 2'OH atom in south puckering  
 469 RNA nucleotides. (A) PCA-based clustering of ARG CZ atom (projection on principal  
 470 components 1 and 2) for all occurrences of ARG residues within 4 Å of the O2' of south  
 471 puckering nucleotides in protein-RNA complexes of the non-redundant database. The two

472 most populated clusters are labeled. (B) Position of the ARG NE, NH1 and NH2 atoms  
 473 around a nucleotide (base omitted for clarity), for the most populated clusters considered  
 474 in (A), coloured by cluster identity. Occupancy isosurfaces corresponding to 60% of  
 475 maximum occupancy are shown as a black wireframe. (C) Histogram of the distance  
 476 between NE atom in ARG and O2', O3', OP1, OP2 and O5' in RNA for all ARG residues  
 477 considered in (A). (D,E) Same as in (C) but for the two most populated clusters. (F,I) Same  
 478 as in (C) but for NH1 and NH2 atom in ARG. (G,H) Same as (F) but for the two most  
 479 populated clusters. (J,K) Same as in (I) but for the two most populated clusters.

480

481

## 482 **Supplementary References**

1. Grant, B. J., Rodrigues, A. P. C., ElSawy, K. M., McCammon, J. A. & Caves, L. S. D. Bio3d: an R package for the comparative analysis of protein structures. *Bioinformatics* **22**, 2695–2696 (2006).
2. Leontis, N. B. & Zirbel, C. L. in *RNA 3D Structure Analysis and Prediction* (eds. Leontis, N. & Westhof, E.) **27**, 281–298 (Springer Berlin Heidelberg, 2012).
3. Westhof, E. & Sundaralingam, M. A method for the analysis of puckering disorder in five-membered rings: the relative mobilities of furanose and proline rings and their effects on polynucleotide and polypeptide backbone flexibility. *J. Am. Chem. Soc.* **105**, 970–976 (1983).
4. Lee, T.-S., Radak, B. K., Pabis, A. & York, D. M. A New Maximum Likelihood Approach for Free Energy Profile Construction from Molecular Simulations. *J. Chem. Theory Comput.* **9**, 153–164 (2013).
5. Cheatham, T. E., Cieplak, P. & Kollman, P. A. A Modified Version of the Cornell *et al.* Force Field with Improved Sugar Pucker Phases and Helical Repeat. *J. Biomol. Struct. Dyn.* **16**, 845–862 (1999).
6. Cornell, W. D. *et al.* A Second Generation Force Field for the Simulation of Proteins, Nucleic Acids, and Organic Molecules. *J. Am. Chem. Soc.* **117**, 5179–5197 (1995).
7. Pérez, A. *et al.* Refinement of the AMBER Force Field for Nucleic Acids: Improving the Description of  $\alpha/\gamma$  Conformers. *Biophys. J.* **92**, 3817–3829 (2007).

8. Zgarbová, M. *et al.* Refinement of the Cornell *et al.* Nucleic Acids Force Field Based on Reference Quantum Chemical Calculations of Glycosidic Torsion Profiles. *J. Chem. Theory Comput.* **7**, 2886–2902 (2011).
9. Banáš, P. *et al.* Performance of Molecular Mechanics Force Fields for RNA Simulations: Stability of UUCG and GNRA Hairpins. *J. Chem. Theory Comput.* **6**, 3836–3849 (2010).
10. Jorgensen, W. L., Chandrasekhar, J., Madura, J. D., Impey, R. W. & Klein, M. L. Comparison of simple potential functions for simulating liquid water. *J. Chem. Phys.* **79**, 926 (1983).
11. Berendsen, H. J. C., Grigera, J. R. & Straatsma, T. P. The missing term in effective pair potentials. *J. Phys. Chem.* **91**, 6269–6271 (1987).
12. Dang, L. X. & Kollman, P. A. Free Energy of Association of the K<sup>+</sup>:18-Crown-6 Complex in Water: A New Molecular Dynamics Study. *J. Phys. Chem.* **99**, 55–58 (1995).
13. Dang, L. X. Mechanism and Thermodynamics of Ion Selectivity in Aqueous Solutions of 18-Crown-6 Ether: A Molecular Dynamics Study. *J. Am. Chem. Soc.* **117**, 6954–6960 (1995).
14. Smith, D. E. & Dang, L. X. Computer simulations of NaCl association in polarizable water. *J. Chem. Phys.* **100**, 3757 (1994).
15. Berendsen, H. J. C., Postma, J. P. M., van Gunsteren, W. F., DiNola, A. & Haak, J. R. Molecular dynamics with coupling to an external bath. *J. Chem. Phys.* **81**, 3684 (1984).
16. Salomon-Ferrer, R., Götz, A. W., Poole, D., Le Grand, S. & Walker, R. C. Routine Microsecond Molecular Dynamics Simulations with AMBER on GPUs. 2. Explicit Solvent Particle Mesh Ewald. *J. Chem. Theory Comput.* **9**, 3878–3888 (2013).
17. Darden, T., York, D. & Pedersen, L. Particle mesh Ewald: An  $N \cdot \log(N)$  method for Ewald sums in large systems. *J. Chem. Phys.* **98**, 10089 (1993).
18. Ryckaert, J.-P., Ciccotti, G. & Berendsen, H. J. . Numerical integration of the cartesian equations of motion of a system with constraints: molecular dynamics of n-alkanes. *J. Comput. Phys.* **23**, 327–341 (1977).

19. Henriksen, N. M., Roe, D. R. & Cheatham, T. E. Reliable Oligonucleotide Conformational Ensemble Generation in Explicit Solvent for Force Field Assessment Using Reservoir Replica Exchange Molecular Dynamics Simulations. *J. Phys. Chem. B* **117**, 4014–4027 (2013).
20. Barducci, A., Bussi, G. & Parrinello, M. Well-Tempered Metadynamics: A Smoothly Converging and Tunable Free-Energy Method. *Phys. Rev. Lett.* **100**, (2008).
21. Huang, M., Giese, T. J., Lee, T.-S. & York, D. M. Improvement of DNA and RNA Sugar Pucker Profiles from Semiempirical Quantum Methods. *J. Chem. Theory Comput.* **10**, 1538–1545 (2014).
22. Tribello, G. A., Bonomi, M., Branduardi, D., Camilloni, C. & Bussi, G. PLUMED 2: New feathers for an old bird. *Comput. Phys. Commun.* **185**, 604–613 (2014).
23. Ufimtsev, I. S. & Martinez, T. J. Quantum Chemistry on Graphical Processing Units. 3. Analytical Energy Gradients, Geometry Optimization, and First Principles Molecular Dynamics. *J. Chem. Theory Comput.* **5**, 2619–2628 (2009).
24. Titov, A. V., Ufimtsev, I. S., Luehr, N. & Martinez, T. J. Generating Efficient Quantum Chemistry Codes for Novel Architectures. *J. Chem. Theory Comput.* **9**, 213–221 (2013).
25. Götz, A. W., Clark, M. A. & Walker, R. C. An extensible interface for QM/MM molecular dynamics simulations with AMBER. *J. Comput. Chem.* **35**, 95–108 (2014).
26. Isborn, C. M., Götz, A. W., Clark, M. A., Walker, R. C. & Martínez, T. J. Electronic Absorption Spectra from MM and *ab Initio* QM/MM Molecular Dynamics: Environmental Effects on the Absorption Spectrum of Photoactive Yellow Protein. *J. Chem. Theory Comput.* **8**, 5092–5106 (2012).
27. Grimme, S., Antony, J., Ehrlich, S. & Krieg, H. A consistent and accurate *ab initio* parametrization of density functional dispersion correction (DFT-D) for the 94 elements H-Pu. *J. Chem. Phys.* **132**, 154104 (2010).
28. Steinbrecher, T., Latzer, J. & Case, D. A. Revised AMBER Parameters for Bioorganic Phosphates. *J. Chem. Theory Comput.* **8**, 4405–4412 (2012).
29. Bergonzo, C. & Cheatham, T. E. Improved Force Field Parameters Lead to a Better

Description of RNA Structure. *J. Chem. Theory Comput.* **11**, 3969–3972 (2015).

483

484 30. Kästner J, Carr JM, Keal TW, Thiel W, Wander A, Sherwood P: DL-FIND: An Open-  
485 Source Geometry Optimizer for Atomistic Simulations. *J. Phys. Chem. A*, **113**, 11856–  
486 11865 (2009).

487 31. ChemShell, a Computational Chemistry Shell, see [www.chemshell.org](http://www.chemshell.org)

488 32. Sherwood P, de Vries AH, Guest MF, Schreckenbach G, Catlow CRA, French SA,  
489 Sokol AA, Bromley ST, Thiel W, Turner AJ, et al.: QUASI: A general purpose  
490 implementation of the QM/MM approach and its application to problems in catalysis. *J.*  
491 *Mol. Struct. THEOCHEM*, **632**,1–28 (2003).

492 33. Ahlrichs R, Bär M, Häser M, Horn H, Kölmel C: Electronic structure calculations on  
493 workstation computers: The program system turbomole. *Chem. Phys. Lett.*, **162**,165–  
494 169 (1989).

495 34. Becke AD: Density-functional exchange-energy approximation with correct asymptotic  
496 behavior. *Phys. Rev. A*, **38**, 3098–3100 (1988).

497 35. Lee, Yang, Parr: Development of the Colle-Salvetti correlation-energy formula into a  
498 functional of the electron density. *Phys. Rev. B. Condens. Matter*, **37**,785–789 (1988).

499 35. Eichkorn K, Weigend F, Treutler O, Ahlrichs R: Auxiliary basis sets for main row atoms  
500 and transition metals and their use to approximate Coulomb potentials. *Theor. Chem.*  
501 *Accounts Theory, Comput. Model. (Theoretica Chim. Acta)*, **97**,119–124 (1997).

502 37. Weigend F, Ahlrichs R, Weigend F, Furche F, Ahlrichs R, Leininger T, Nicklass A,  
503 Küchle W, Stoll H, Dolg M, et al.: Balanced basis sets of split valence, triple zeta  
504 valence and quadruple zeta valence quality for H to Rn: Design and assessment of  
505 accuracy. *Phys. Chem. Chem. Phys.*, **7**,3297 (2005).

506 38. Eichkorn K, Treutler O, Öhm H, Häser M, Ahlrichs R: Auxiliary basis sets to  
507 approximate Coulomb potentials. *Chem. Phys. Lett.*, **240**,283–290 (1995).

508 39. Sinnecker S, Rajendran A, Klamt A, Michael Diedenhofen S and, Frank Neese:  
509 Calculation of Solvent Shifts on Electronic g-Tensors with the Conductor-Like  
510 Screening Model (COSMO) and Its Self-Consistent Generalization to Real Solvents  
511 (Direct COSMO-RS). *J. Phys. Chem. A*, **110**,2235–2245 (2006).

512
